# Supplementary material for: Molecular basis for catabolism of the abundant metabolite trans-4-hydroxy-L-proline by a microbial glycyl radical enzyme
Source: eLife. 2020 Mar 17;9:e51420. doi: 10.7554/eLife.51420 (PMC7077986; doi:10.7554/eLife.51420)
Supplement: Figure 2—source data 1. — Coordinates of zwitterionic Hyp structure used to fit into the HypD crystal structure. [file elife-51420-fig2-data1.xlsx]

## Sheet: Sheet1
Figure 2, source data 1. Cartesian coordinates for zwitterionic Hyp in Cγ-exo pucker calculated from DFT.
Coordinates of zwitterionic Hyp structure used to fit into the HypD crystal structure.
N	0.206357	1.10535	-0.52589
C	1.06483	1.04145	0.701676
C	-0.40746	-0.28177	-0.66796
H	0.391256	1.12016	1.55776
H	1.79178	1.85467	0.707412
C	1.69341	-0.34196	0.589719
C	0.522207	-1.2255	0.118162
H	-0.48364	-0.5171	-1.73089
C	-1.86028	-0.11771	-0.04063
H	-0.034	-1.65295	0.957941
H	0.886365	-2.06147	-0.48846
O	-2.44922	-1.17391	0.189775
O	-2.17093	1.09895	0.133994
H	0.754198	1.39512	-1.33745
O	2.70045	-0.20189	-0.41598
H	2.12723	-0.67123	1.54319
H	3.04481	-1.08426	-0.62427
H	-0.64106	1.64738	-0.37211
