# Supplementary material for: Molecular basis for catabolism of the abundant metabolite trans-4-hydroxy-L-proline by a microbial glycyl radical enzyme
Source: eLife. 2020 Mar 17;9:e51420. doi: 10.7554/eLife.51420 (PMC7077986; doi:10.7554/eLife.51420)
Supplement: Figure 2—source data 2. — Coordinates of zwitterionic Hyp structure used to fit into the HypD crystal structure. [file elife-51420-fig2-data2.xlsx]

## Sheet: Sheet1
Figure 2, source data 2. Cartesian coordinates for zwitterionic Hyp in Cγ-endo pucker calculated from DFT.
Coordinates of zwitterionic Hyp structure used to fit into the HypD crystal structure.
N	1.13874	-0.0408	0.25613
C	1.57462	1.27676	-0.2141
C	-0.1842	-0.0141	0.85481
H	1.70693	1.31226	-1.2974
H	2.51431	1.57238	0.26137
C	0.44347	2.22313	0.19105
C	-0.355	1.46598	1.24533
H	-0.218	-0.6733	1.72183
C	-1.2582	-0.5082	-0.1216
H	-1.3919	1.79439	1.27969
H	0.09256	1.63335	2.22759
O	-1.0889	-0.7573	-1.2838
O	-2.4366	-0.6271	0.51955
H	1.78891	-0.3581	0.94647
H	-0.1746	2.44543	-0.6536
O	0.97937	3.42749	0.74533
H	1.39813	3.41357	1.60907
H	1.11531	-0.6725	-0.5414
