# Supplementary material for: Molecular basis for catabolism of the abundant metabolite trans-4-hydroxy-L-proline by a microbial glycyl radical enzyme
Source: eLife. 2020 Mar 17;9:e51420. doi: 10.7554/eLife.51420 (PMC7077986; doi:10.7554/eLife.51420)
Supplement: Figure 5—source data 1. — Individual data points are recorded for each assay (n = 3 individual experiments) measuring Pro and Hyp concentrations by LC-MS/MS after HypD coupled assay. See Figure 5B (Pro concentration) and Figure 5C (Hyp concentration) for these data points visualized in bar graphs. [file elife-51420-fig5-data1.xlsx]

## Sheet: Sheet1
Fig. 5B - Proline concentration (µM)
WT			no P5CR			G765A			C434S			H160Q			D278N			D339N			E436Q			S334A			F340A			Y450F			T645A			Y450F/T645A			Hyp only
188.184	198.592	195.576	0.358927	0.488735	0.326866	0	0	0	0	0	0	0	0	0	0.899771	0.960449	0.754143	0	0	0	0	0	0	1.26758	1.17296	0.967304	6.96193	6.85167	6.80241	29.4907	31.5136	32.9345	29.1231	28.051	31.3823	1.69454	1.30121	1.24882	0	0.293815	0.455295
Fig. 5C - Hydroxyproline concentration (µM)
WT			no P5CR			G765A			C434S			H160Q			D278N			D339N			E436Q			S334A			F340A			Y450F			T645A			Y450F/T645A			Hyp only
0	0	0	0	0	0	202.521	216.922	213.556	215.281	210.895	206.526	207.297	209.955	211.494	210.822	213.671	217.211	222.724	219.737	217.346	208.957	207.206	199.989	209.557	210.065	210.078	206.055	203.553	204.814	170.558	172.334	158.756	173.986	174.89	187.255	211.93	226.213	210.349	219.704	214.134	204.542
