# Supplementary material for: Molecular basis for catabolism of the abundant metabolite trans-4-hydroxy-L-proline by a microbial glycyl radical enzyme
Source: eLife. 2020 Mar 17;9:e51420. doi: 10.7554/eLife.51420 (PMC7077986; doi:10.7554/eLife.51420)
Supplement: Figure 5—source data 2. — Individual data points for glycyl radical-normalized kobs values of HypD-Y450F and HypD-T645A variants in the HypD coupled assay (scheme shown in Figure 5—figure supplement 2A). These values were used to plot Michaelis-Menten kinetic curves in Figure 5—figure supplement 2B (HypD-Y450F) and Figure 5—figure supplement 2C (HypD-T645A). Figure 6—source data 1. LC-MS/MS data for HypD D2O assay and HypD assay using 2,5,5-D3-Hyp as substrate. LC-MS/MS and calculated percentages of total ions calculated for commercial standard of Pro diluted in D2O and for HypD coupled assays run in D2O, described in Figure 6. The mass 116.1 corresponds to the precursor undeuterated Pro ion, and the fragment 70.1 corresponds to the mass of Pro ion after fragmentation of the carboxylate group. These data were used to calculate average deuterium incorporation in Pro commercial standard in D2O and Pro generated by HypD reaction run in D2O, both presented in Figure 6C. [file elife-51420-fig5-data2.xlsx]

## Sheet: Sheet1
Fig. S10B - HypD-Y450F
	glycyl radical-normalized kobs, s-1
Hyp (mM)	Mean	SD	N
1	0.0196992	0.0076944	3
2	0.0394168	0.00892548	3
5	0.117216	0.0172218	3
10	0.202443	0.028552	3
15	0.25049	0.0348496	3
30	0.363769	0.0510689	3
60	0.426045	0.0638331	3
Fig. S10C - HypD-T645A
	glycyl radical-normalized kobs, s-1
Hyp (mM)	Mean	SD	N
1	0.319061	0.0315071	3
2	0.500705	0.0393323	3
5	1.03142	0.0655732	3
10	1.34732	0.0810343	3
15	1.50189	0.0847653	3
30	1.74333	0.0944587	3
60	1.77379	0.104201	3
