# Supplementary material for: Molecular basis for catabolism of the abundant metabolite trans-4-hydroxy-L-proline by a microbial glycyl radical enzyme
Source: eLife. 2020 Mar 17;9:e51420. doi: 10.7554/eLife.51420 (PMC7077986; doi:10.7554/eLife.51420)
Supplement: Figure 6—source data 1. — LC-MS/MS and calculated percentages of total ions calculated for commercial standard of Pro diluted in D2O and for HypD coupled assays run in D2O, described in Figure 6. The mass 116.1 corresponds to the precursor undeuterated Pro ion, and the fragment 70.1 corresponds to the mass of Pro ion after fragmentation of the carboxylate group. These data were used to calculate average deuterium incorporation in Pro commercial standard in D2O and Pro generated by HypD reaction run in D2O, both presented in Figure 6C. [file elife-51420-fig6-data1.xlsx]

## Sheet: Sheet2
A. LC-MS/MS peak areas for L-Proline control in D2O and HypD reactions run in D2O (n=3)							B. Percent total ions for L-Proline control in D2O and HypD reactions run in D2O (n=3)					C. Percent total ions breakdown for each of HypD rxn run in D2O (n=3)
Precursor ion	Fragment	LC-MS/MS Peak area, L-Pro Control in D2O	LC-MS/MS Peak area, Sample 1	LC-MS/MS Peak area, Sample 2	LC-MS/MS Peak area, Sample 3		Precursor ion	Fragment	%Total ions for L-Pro Control in D2O	%Total ions for HypD rxns, n=3		%Total ions for HypD rxns, Sample 1	%Total ions for HypD rxns, Sample 2	%Total ions for HypD rxns, Sample 3	Mean	St. Dev.
116.1	70.1	5136348	6019305	2469916	3857200		116.1	70.1	94.7479	84.7 ± 2.9		84.1209	82.1437	87.8233	84.6959	2.88311
117.1	70.1	47912	55505	19978	37368		117.1	70.1	0.883811	0.8 ± 0.1		0.775692	0.664422	0.850819	0.763645	0.0937807
117.1	71.1	175934	941917	404572	378975		117.1	71.1	3.24538	11.7 ± 2.7		13.1635	13.4551	8.62875	11.7491	2.70625
118.1	71.1	0	10548	7803	8235		118.1	71.1	0	0.2 ± 0.1		0.14741	0.25951	0.1875	0.19814	0.0568022
118.1	72.1	60874	108341	89275	93384		118.1	72.1	1.12292	2.2 ± 0.8		1.51409	2.96908	2.12623	2.20313	0.73054
120.1	74.1	0	19926	15279	16841		120.1	74.1	0	0.4 ± 0.1		0.278469	0.508144	0.383447	0.39002	0.114978
												100	100	100	100
					sum	5421068	7155542	3006823	4392003
					pro/sum	94.7479	84.1209	82.1437	87.8233
